# Supplementary material for: A cyclic tetranuclear cuboid type copper(ii) complex doubly supported by cyclohexane-1,4-dicarboxylate: molecular and supramolecular structure and cyclohexane oxidation activity
Source: Royal Society of Chemistry journal article supplement (doi:10.1039/c4ra06986b), 2014-01-01
Supplement: c4ra06986b1.pdf [file c4ra06986b1.pdf]

## Electronic Supplementary Information for

### **A Cyclic Tetranuclear Cuboid Type Copper(II) Complex Doubly Supported by Cyclcohexane-1,4-Dicarboxylate: Molecular and Supramolecular Structure and Cyclohexane Oxidation Activity**

Susanta Hazra, Sanghamitra Mukherjee, M. Fátima C. Guedes da Silva and Armando J. L. Pombeiro\*

Centro de Química Estrutural, Instituto Superior Técnico, Universidade de Lisboa, Av. Rovisco Pais, 1049-001, Lisboa, Portugal. E-mail:pombeiro@tecnico.ulisboa.pt

#### **Synthesis and Characterization of [Cu<sub>2</sub>L<sub>2</sub>Cl<sub>2</sub>]**

The dichlorobridged dicopper(II) was synthesized in a procedure which is slightly different to the reported one<sup>1</sup>. To a hot and stirring water solution (10 mL) of 2-aminobenzenesulfonic acid (0.173 g, 1.00 mmol) was added a methanol solution (5 mL) of pyridine-2-carboxyaldehyde (0.107 g, 1.00 mmol) dropwise and the solution was stirred for 4 h. To the resulting orange solution was added dropwise a methanol solution (5 mL) of CuCl<sub>2</sub>·2H<sub>2</sub>O (0.170 g, 1.00 mmol) to produce a dark green solution. After stirring for one more hour, the solution was filtered and kept for slow evaporation. After 2 days, a green crystalline compound containing diffractable crystals that deposited was collected by filtration and washed with methanol. Yield: 0.306 g (85%). C<sub>24</sub>H<sub>18</sub>N<sub>4</sub>O<sub>6</sub>S<sub>2</sub>Cl<sub>2</sub>Cu<sub>2</sub> (721): Calcd. C, 40.01; H, 2.52; N, 7.78. Found: C, 40.35; H, 2.49; N, 7.71.

**Crystallographic Data:** Crystal system = monoclinic; Space group = *P*2<sub>1</sub>/*c*; *a* = 6.757(3); *b* = 15.226(7); *c* = 12.246(4);  $\alpha = \gamma = 90.00$ ;  $\beta = 95.75(2)$ ; *V* = 1253.5(9); *Z* = 2.

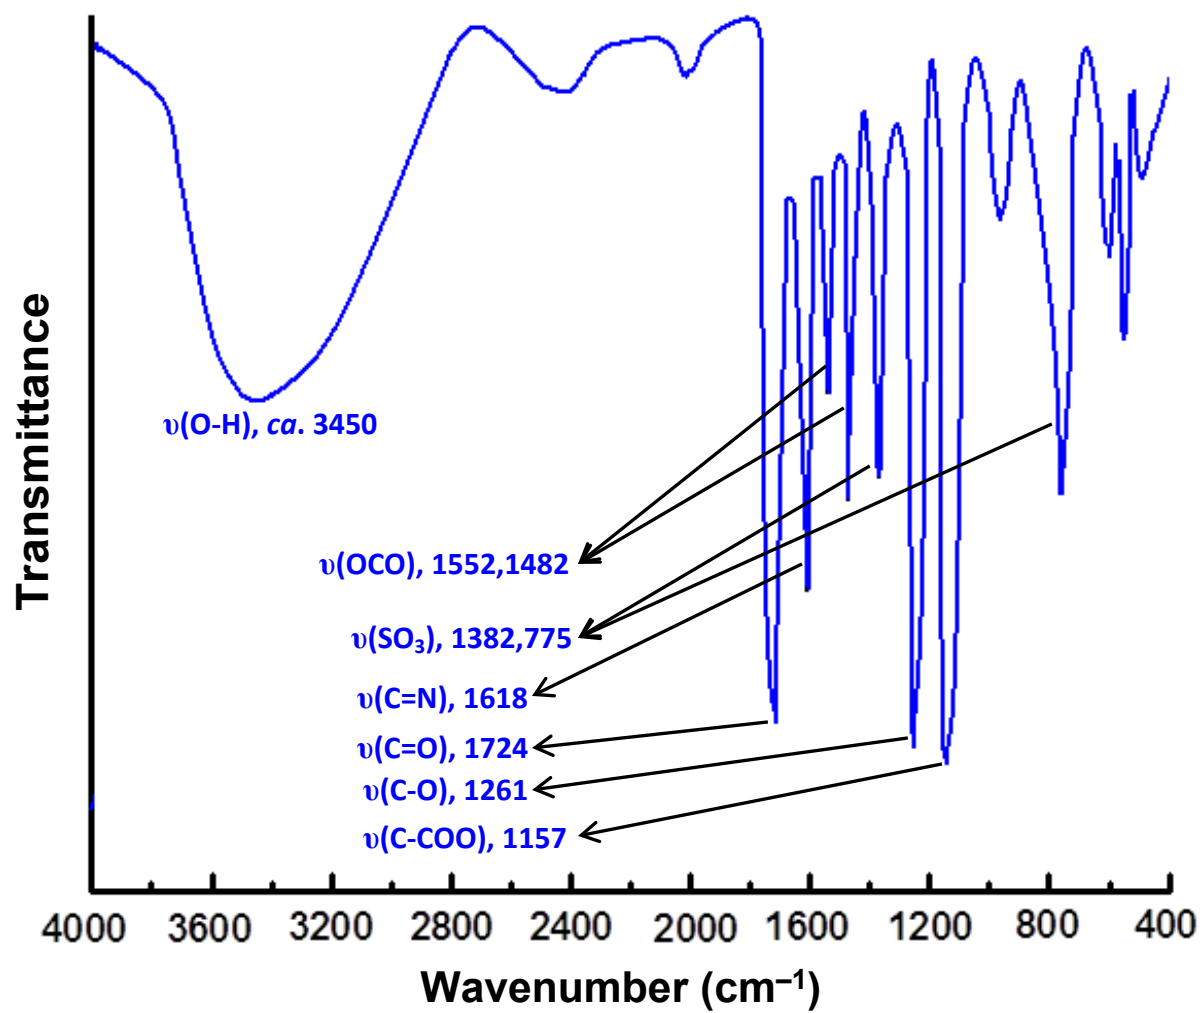

**Fig. S1.** FT-IR spectrum of  $[(\text{CuL})_2(\mu_4\text{-O,O',O'',O''''-CDC})]_2 \cdot 2\text{H}_2\text{O}$  (**1**) in the 4000–400 cm<sup>-1</sup> region.

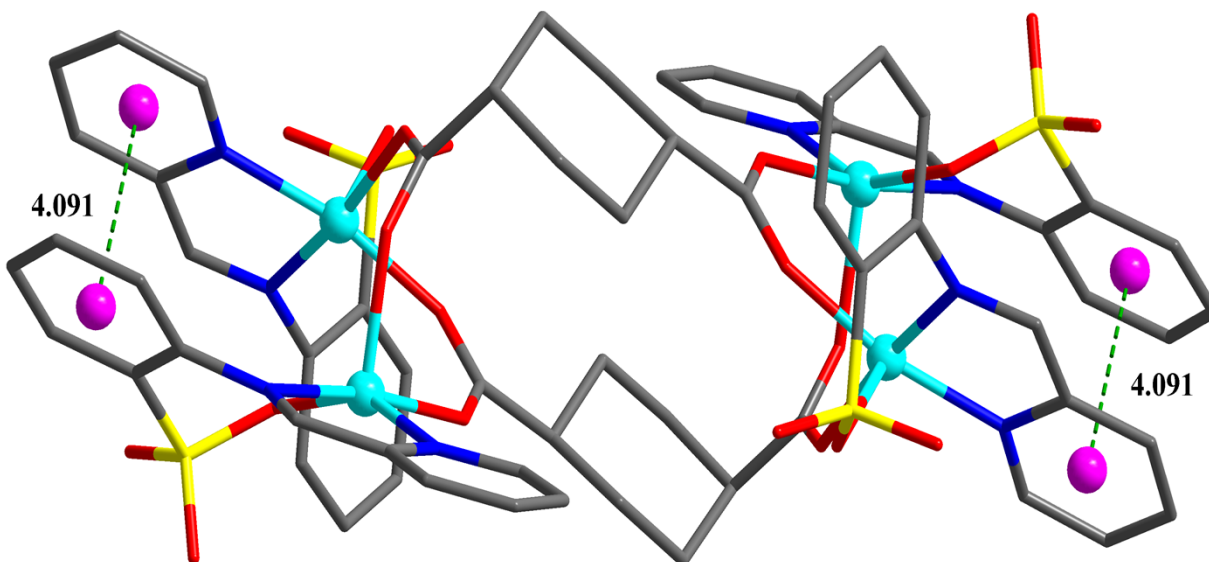

**Fig. S2.**  $\pi \cdots \pi$  interactions (*centroid* $\cdots$ *centroid* distance of 4.091 Å) between C21-phenyl and N3-pyridyl rings in  $[(\text{CuL})_2(\mu_4\text{-O,O',O'',O'''}\text{-CDC})]_2 \cdot 2\text{H}_2\text{O}$  (**1**). Atom colors: carbon, ash; oxygen, red; sulfur, yellow; nitrogen, blue; hydrogen, green; copper, cyan; centroid, pink.

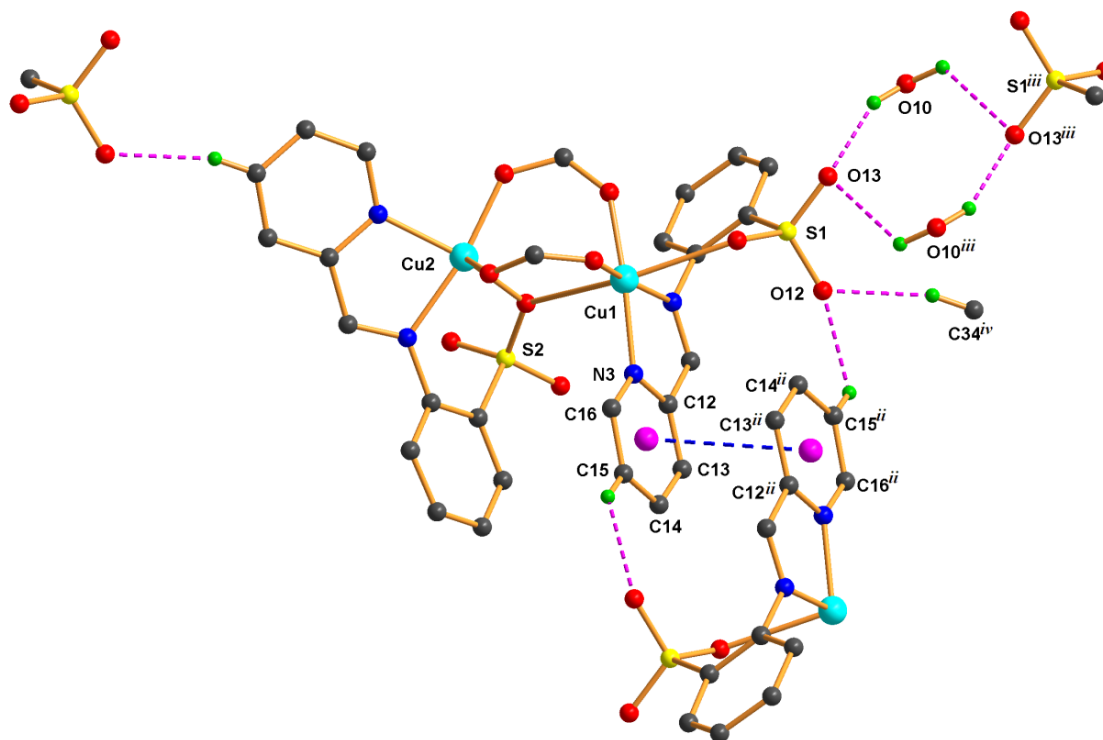

**Fig. S3.** Representation of the  $\pi \cdots \pi$  interaction (*centroid* $\cdots$ *centroid* distance of 3.694 Å) between the N3-pyridyl rings and of the H-bond contacts in the structure of  $[(\text{CuL})_2(\mu_4\text{-O,O',O'',O'''}\text{-CDC})]_2 \cdot 2\text{H}_2\text{O}$  (**1**). Atom colors: carbon, ash; oxygen, red; sulfur, yellow;

nitrogen, blue; hydrogen, green; copper, cyan; centroid, pink. Symmetry, *ii*), 1-x, -y, 1-z; *iii*), 1-x, 1-y, 1-z; *iv*) x, y, -1+z.

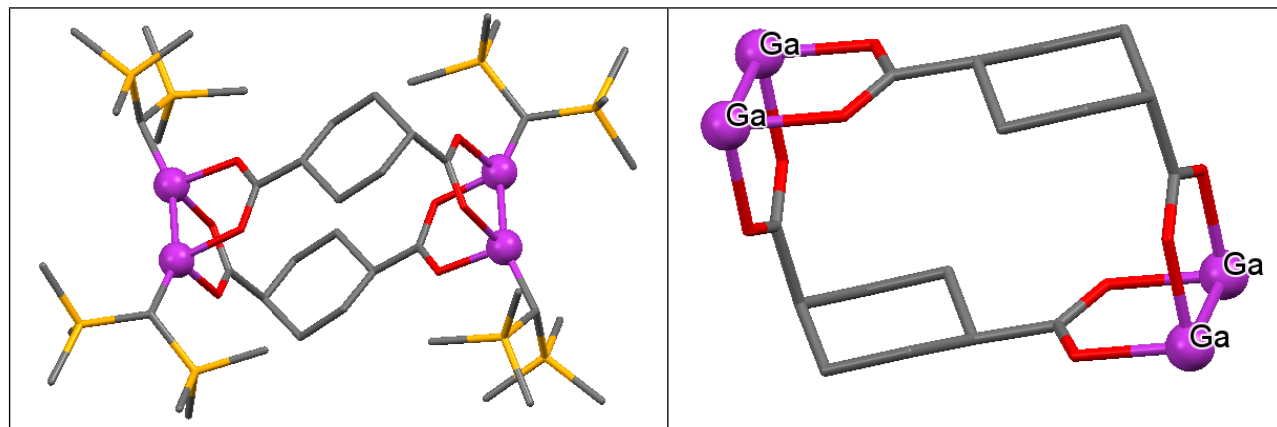

**Fig. S4.** Tetranuclear gallium complex<sup>2</sup> and the *cuboid* cage inside the molecule formed by doubly bridged cyclohexane dicarboxylate.

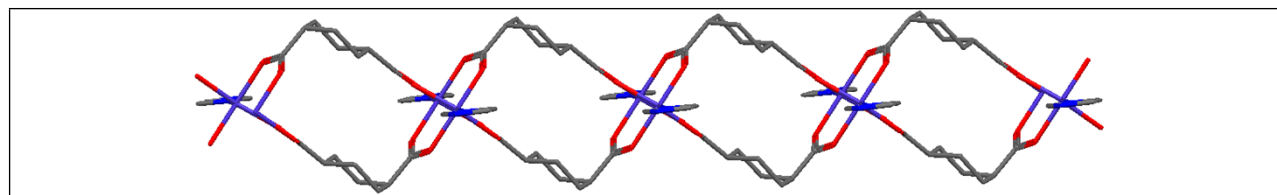

**Fig. S5.** Polymeric Co(II) compound<sup>3</sup> with inter-connected metal-CDC *cuboid* cages.

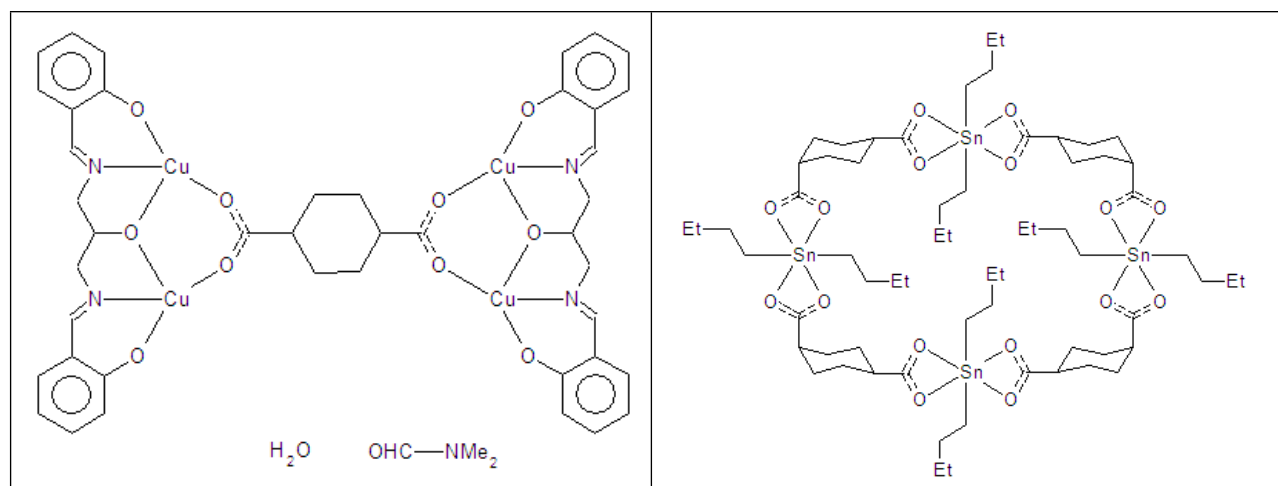

**Scheme S1.** Single bridged tetranuclear Cu(II) complex<sup>4</sup> and quadruple bridged tetranuclear Sn(IV) complex<sup>5</sup> with cyclohexane dicarboxylate bridge.

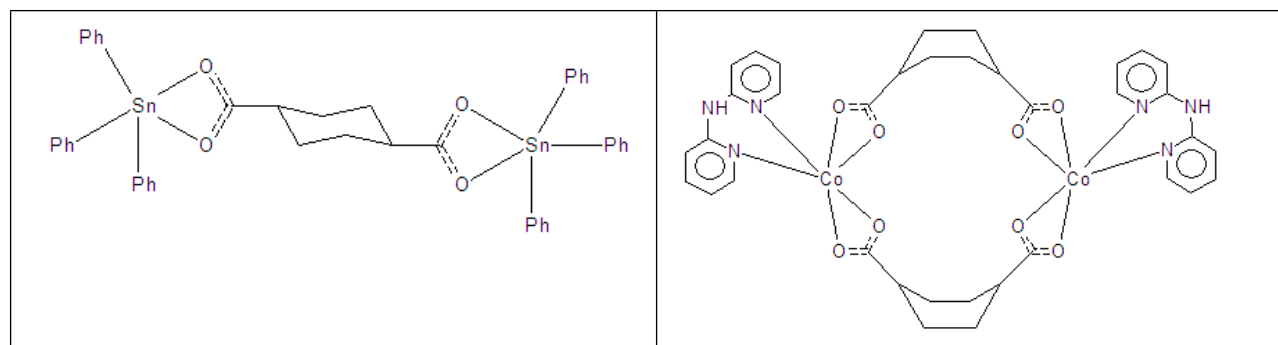

**Scheme S2.** Single CDC-bridged dinuclear Sn(IV) complex<sup>5</sup> and doubly CDC-bridged dinuclear Co(II) complex<sup>6</sup>.

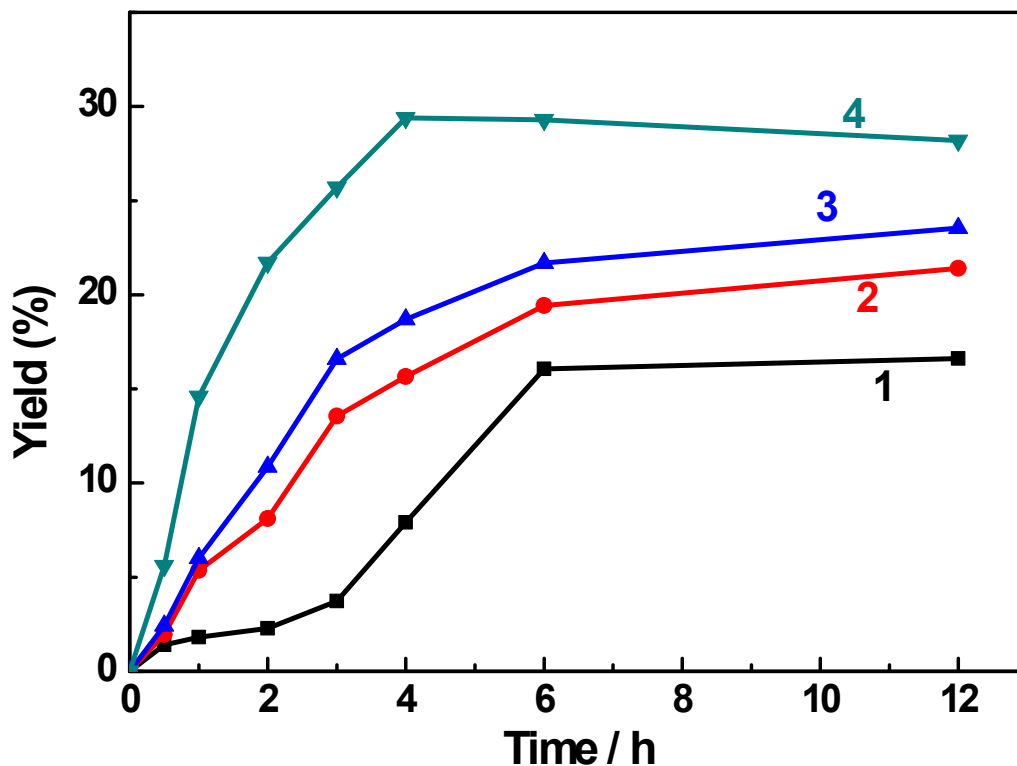

**Fig. S6.** Effect of  $\text{H}_2\text{O}_2$  amount: accumulation of products (total of cyclohexanol and cyclohexanone, yield percentage) with time in the oxidation of cyclohexane (0.49 M) at 50 °C in  $\text{CH}_3\text{CN}$ , catalyzed by complex **1** ( $0.6 \times 10^{-3}$  M) in the presence of different concentrations of  $\text{H}_2\text{O}_2$ : 0.3 M (curve 1), 0.8 M (curve 2), 1.5 M (curve 3) and 2.0 M (curve 4).

#### Thermal Properties of $[(\text{CuL})_2(\mu_4\text{-O}, \text{O}', \text{O}'', \text{O}''')\text{-CDC}]_2 \cdot 2\text{H}_2\text{O}$ (**1**)

Thermogravimetric analysis was carried out under dinitrogen atmosphere in the range of the room temperature (30 °C) to 800 °C at an applied heating rate of 5 °C  $\text{min}^{-1}$ . Features of the thermal stability of the complex  $[(\text{CuL})_2(\mu_4\text{-O}, \text{O}', \text{O}'', \text{O}''')\text{-CDC}]_2 \cdot 2\text{H}_2\text{O}$  (**1**) are illustrated in Fig. S7. The compound is stable up to the temperature of 230 °C, beyond which it gradually degrades, the weight loss ceasing at 700 °C. The weight loss of 69.0 % along this temperature range may be accounted for the total removal of the organic ligand ( $\text{L}^-$ ) from the coordination sphere of the metal. It is slightly less than the calculated one (71.6 %) if the final product is assumed to be a mixture of  $\text{CuSO}_4$  and  $\text{CuO}$  in a molar ratio of 1:1.

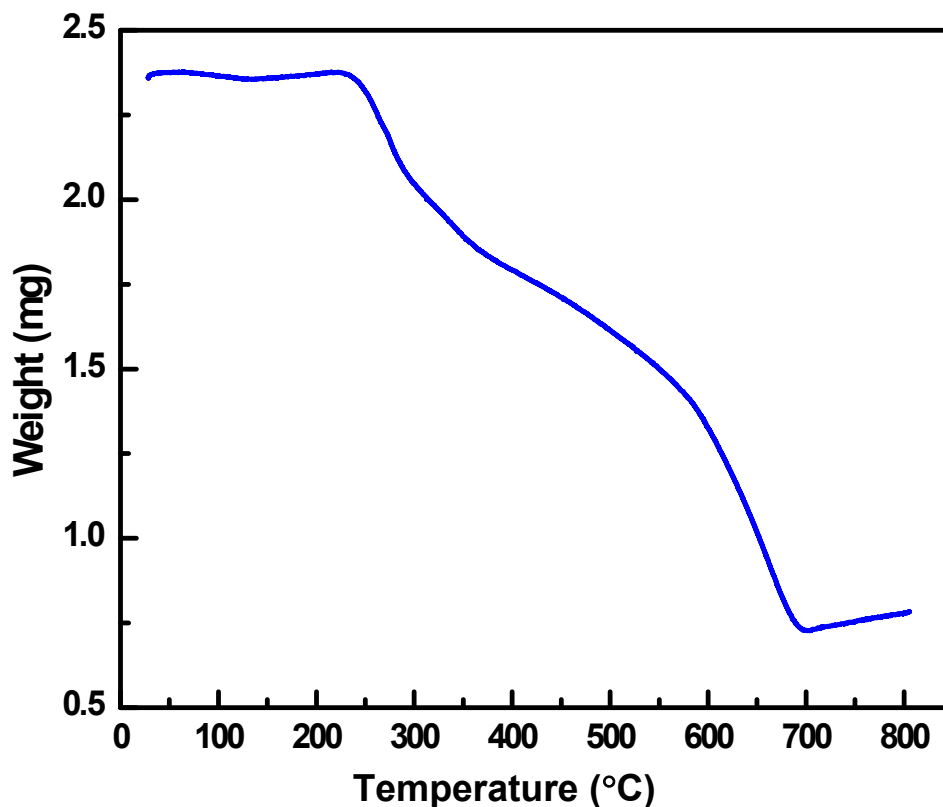

**Fig. S7.** Thermogravimetric analysis curve of  $[(\text{CuL})_2(\mu_4\text{-O}, \text{O}', \text{O}'', \text{O}''')\text{-CDC}]_2 \cdot 2\text{H}_2\text{O}$  (**1**) under dinitrogen atmosphere. Heating rate: 5 °C/min. Weight of the sample: 2.353 mg.

#### References:

1. Y.-M. Ou, Z.-Y. Zhao, Y.-H. Shi, Y.-L. Zhang, Y.-M. Jiang and J. Huaxue, *Chin. J. Struct. Chem.*, 2009, **28**, 457.
2. W. Uhl, T. Spies and W. Saak, *Eur. J. Inorg. Chem.*, 1998, 1661.
3. Y. Gong, C. W. Hu, H. Li, K. L. Huang and W. Tang, *J. Solid State Chem.*, 2005, **178**, 3152.
4. C.-Y. Chen, J.-W. Lu and H.-H. Wei, *J. Chin. Chem. Soc.*, 2009, **56**, 89.
5. C. Ma, Y. Wang and R. Zhang, *Inorg. Chim. Acta*, 2009, **362**, 4137.
6. H. Kumagai, M. Akita-Tanaka, S. Kawata, K. Inoue, C. J. Kepert and M. Kurmoo, *Cryst. Growth Des.*, 2009, **9**, 2734.
